# Supplementary material for: RETRACTED ARTICLE: Systematic Assessment of Research on Autism Spectrum Disorder and Mercury Reveals Conflicts of Interest and the Need for Transparency in Autism Research
Source: PubMed Central journal article supplement (PMC5705728; doi:10.1007/s11948-015-9713-6), 2015-10-27
Supplement: 11948_2015_9713_MOESM1_ESM.pdf [file 11948_2015_9713_MOESM1_ESM.pdf]

# Systematic Assessment of Research on Autism Spectrum Disorder and Mercury Reveals Conflicts of Interest and the Need for Transparency in Autism Research

Janet K. Kern<sup>1</sup> · David A. Geier<sup>1</sup> · Richard C. Deth<sup>2</sup> ·  
Lisa K. Sykes<sup>3</sup> · Brian S. Hooker<sup>4</sup> · James M. Love<sup>3</sup> ·  
Geir Bjørklund<sup>5</sup> · Carmen G. Chaigneau<sup>3</sup> ·  
Boyd E. Haley<sup>6</sup> · Mark R. Geier<sup>1</sup>

Received: 31 August 2015 / Accepted: 19 October 2015

© The Author(s) 2015. This article is published with open access at Springerlink.com

**Abstract** Historically, entities with a vested interest in a product that critics have suggested is harmful have consistently used research to back their claims that the product is safe. Prominent examples are: tobacco, lead, bisphenol A, and atrazine. Research literature indicates that about 80–90 % of studies *with* industry affiliation found no harm from the product, while only about 10–20 % of studies *without* industry affiliation found no harm. In parallel to other historical debates, recent studies examining a possible relationship between mercury (Hg) exposure and autism spectrum disorder (ASD) show a similar dichotomy. Studies sponsored and

---

✉ Janet K. Kern  
jkern@dfwair.net

David A. Geier  
davidallengeier@comcast.net

Richard C. Deth  
rdeth@nov.edu

Lisa K. Sykes  
syklo05@verizon.net

Brian S. Hooker  
bhooker@simpsonu.edu

James M. Love  
jlove@titushillis.com

Geir Bjørklund  
bjorklund@conem.org

Carmen G. Chaigneau  
mamelchinito@gmail.com

Boyd E. Haley  
behaley@ctiscience.com

Mark R. Geier  
mgeier@comcast.net

supported by industry or entities with an apparent conflict of interest have most often shown no evidence of harm or no “consistent” evidence of harm, while studies *without* such affiliations report positive evidence of a Hg/autism association. The potentially causal relationship between Hg exposure and ASD differs from other toxic products since there is a broad coalition of entities for whom a conflict of interest arises. These include influential governmental public health entities, the pharmaceutical industry, and even the coal burning industry. This review includes a systematic literature search of original studies on the potential relationship between Hg and ASD from 1999 to date, finding that of the studies *with* public health and/or industry affiliation, 86 % reported no relationship between Hg and ASD. However, among studies *without* public health and/or industry affiliation, only 19 % reported no relationship between Hg and ASD. The discrepancy in these results suggests a bias indicative of a conflict of interest.

**Keywords** Research · Conflict of interest · Transparency · Autism · Mercury · Toxicants

## Introduction

A possible link between exposure to mercury (Hg) and autism spectrum disorder (ASD) is a recent example of a heated debate over the association between a pervasive toxic exposure and a prevalent and devastating diagnosis. The heated debate began in the late 1990s, when it was suggested that exposure to Hg in vaccines was a risk factor for ASD (Lewsey 1999). In this case, as in those before it, whenever there has been a possible link between illness and a toxic exposure, there has been heated debate characterized by adamant denial.

Denial of a toxicant in disease causation can be attributed in part and firstly, to a natural inclination to resist unpleasant theories. A historical illustration of this was acrodynia (also known as Pink Disease). This almost forgotten disease, mostly affecting infants and young children, is a well-studied example of human Hg poisoning (Bjørklund 1995). Hg as the cause of acrodynia was first suggested in 1846, and again in 1922 (Hanson and Pleva 1991). Warkany and Hubbard (1948) from the United States (US) demonstrated Hg involvement in 25 out of 28 cases of acrodynia in 1948. When Hg-containing teething powders were withdrawn from the market in Australia in 1953 (followed later by the US), there was a dramatic fall in the incidence and mortality rate from acrodynia (Bjørklund 1995). However, the

<sup>1</sup> Institute of Chronic Illnesses, Inc., 14 Redgate Court, Silver Spring, MD 20905, USA

<sup>2</sup> Nova Southeastern University, Fort Lauderdale, FL, USA

<sup>3</sup> CoMeD, Inc., Silver Spring, MD, USA

<sup>4</sup> Simpson University, Redding, CA, USA

<sup>5</sup> Council for Nutritional and Environmental Medicine, Mo i Rana, Norway

<sup>6</sup> University of Kentucky, Lexington, KY, USA

role of Hg as the primary source of acrodynia was not universally accepted even as late as 1956 (Dathan and Harvey 1965). Throughout these decades of heated debate, the science indicating acrodynia was caused by Hg exposure was resisted because, as stated by a historian studying the social and medical aspects of the illness, “poisoning was not a fashionable diagnosis” (Dally 1997).

Resistance to linking a toxic exposure to an illness can also result from a concern for liability. The responsibility for an illness or disability that results from a toxic product is borne by the industry that manufactures it, and resistance to a link between illness and an antecedent exposure is often driven by an industry that fears the consequences, since it is in their best interest to do so (Brownell and Warner 2009; McComas 2008; Friedman and Richter 2005; Sass 2006; Bridbord and Hanson 2009; Ong and Glantz 2001; Hayes 2004). As a result, conflicts of interest enter these debates and the resulting discourse is often marred by misleading information, which, unfortunately, often includes misleading assessments concerning the state of scientific research.

Historically, entities with a vested interest in a product that critics have suggested is harmful have consistently used research to back their claim that a product is safe. Brownell and Warner (2009) reviewed the issue of conflict of interest in research. They concluded that industry manipulates research information to buy loyalty, instill doubt about criticisms, confuse the public, give ammunition to political allies, and stall or influence government action. This practice, as noted by Brownell and Warner (2009) and many other experts on the subject, continues to the present day (Barnoya and Glantz 2006; Mars and Ling 2008; Schick and Glantz 2007; Michaels 2008; Kessler 2001; Mooney 2006; Brownell and Warner 2009). The following sections provide examples of research conflicts of interest, starting with tobacco, because much of what we have learned regarding the influencing or “buying” of scientists is from tobacco litigation.

## Past and Current Examples of Research Conflict of Interest and Outside Influences

### Tobacco

The tobacco industry spent significant funds in their attempts to undermine the science with respect to a link between smoking and lung disease (including issues related to secondhand smoke), calling into doubt the research that showed harm from smoking (McGarity and Wagner 2008; Tong and Glantz 2007). Evidence indicates that the industry paid prominent scientists to conduct studies with the intent of countering potentially damaging scientific evidence (Cummings et al. 2007). Internal documents revealed that the industry devised a plan to become a major sponsor of medical research (Draft Recommendations for Cigarette Manufacturers 1953). According to Brandt (2012) this “call for new research” was intended to: (1) give the impression that existing studies were inadequate or flawed, referring to them as “junk” science, and (2) to create uncertainty about the harm from tobacco while making the industry appear to be a committed participant in the

scientific endeavor (Brownell and Warner 2009). The industry developed research programs that offered funds directly to university-based scientists that would enlist their support and develop their financial dependence (Brandt 2012).

## Lead

Another example is lead (Pb) poisoning. Pb poisoned the environment for decades while being used in many products (gasoline, paint, and pipes) before action was taken. The first documented case of childhood Pb poisoning in the US was in 1914. By 1930, Pb paint was regulated or banned in most European countries. Nevertheless, the US lead industry fought federal and local regulation of its products and promoted its use for several more decades (Grist et al. 2004).

The toxicity of Pb was the subject of heated debate, and the debate was again marked by resistance, conflicts of interest, and misleading information. As reported by Bridbord and Hanson (2009), the Pb industry used the public relations capabilities to advertise the benefits of their products to the general public while casting doubt on the possibility of harm associated with its use. This was achieved, "...in large part, by being the primary supporter of research on health effects of lead and relying upon the scientists that it supported to communicate and interpret this research to the government and the public." (Bridbord and Hanson 2009; Sykes et al. 2014). The misinformation from research on this issue may have influenced policy-makers, because policymakers pursued a strategy that focused on diagnosing children after they were poisoned (the effect) rather than identifying toxic sources (the cause), which in effect allowed children to be Pb exposed and Pb poisoned for years to come (Grist et al. 2004).

## Methylmercury

Minamata disease provides another example of a heated debated about the link between toxic exposure and the resulting diagnosis. Minamata disease was caused by methyl-Hg poisoning, where the putative source of the Hg was methyl-Hg-cysteine from contaminated fish. The fish were contaminated with methyl-Hg from the dumping of mercury-laden waste into water in Minamata, Japan by the Chisso Plant. The disease was attributed to many other causes: infection, explosions, etc., with some of the alternative theories being promoted by the Chisso Plant itself, the company ultimately found to be responsible for the exposure (Takeuchi et al. 1978). Early studies conducted by the Chisso Plant found their industrial waste caused the disease; however, that information was not published. In fact, even while knowing this information, the Chisso Plant funded research into alternative causes of the disease, other than its own waste (Encyclopedia of the Earth 2009).

## Atrazine

Reports of conflicts of interest in research include the herbicide atrazine, which was banned in the European Union in 2004, but is still used in the US (European Commission 2004). Hayes (2004) found that financial sponsorship was a strong

predictor of study outcome for atrazine research ( $p = 0.009$ ). Thus funding sources varied for studies reporting adverse effects (including government and industry funding), but all of the studies that failed to detect adverse effects were funded by the manufacturer of atrazine.

### **Bisphenol A**

Similar to atrazine research, vom Saal and Hughes (2005), who studied bisphenol A (BPA), found that no BPA industry-funded studies have ever reported significant effects from low doses of BPA, although >90 % of government-funded studies reported significant effects from low doses of BPA. Moreover, some of the industry-funded BPA studies that reported no significant effects used a strain of rat that was inappropriate for the study of estrogenic responses (vom Saal and Hughes 2005).

### **Olestra**

Similar results have been reported in food research. For example, among studies supportive of the fat substitute olestra, 80 % were funded by the food industry; however, in contrast, only 21 % of neutral studies and 11 % of studies critical of olestra have been funded by the industry. All authors affiliated with the maker of olestra have published studies that were supportive of olestra (Levine et al. 2003).

### **Conflicts of Interest in Mercury Exposure and Autism Research**

Conflicts of interest in studies examining Hg exposure and the resulting risk of ASD have been noted (DeSoto and Hinton 2010). In parallel to other historical debates over potential toxicants and their resulting adverse effects, studies examining the Hg-autism link that were sponsored and supported by entities with apparent conflicts of interest, often show no evidence of harm or no “consistent” evidence of harm from Hg exposure, even in the most vulnerable subjects, human fetuses and infants.

For example, studies on Hg exposure from coal-burning plants conducted by researchers *without* industry affiliation consistently show that Hg exposure from coal burning is a significant risk factor for ASD (Palmer et al. 2006, 2009; Pennington et al. 2011; Windham et al. 2006). In contrast, Lewandowski et al. (2009), researchers *with* industry affiliation, examined the relationship between Hg release in Texas and ASD and found different results. Dr. Lewandowski works for Gradient, a product defense consulting firm that has received substantial sums from companies to write reports defending products such as cigarettes and BPA (Keim 2007). Lewandowski et al. (2009) concluded that Hg emissions are not “consistently” associated with ASD prevalence in Texas school districts.

Another example of such conflict of interest in research is found in studies conducted on the safety of RhoD immune globulin (RhoGam). Different formulations of Thimerosal (49.55 % Hg by weight)-containing RhoGam were routinely administered to Rh-negative mothers in the US prior to 2002. Studies conducted by

researchers *without* industry affiliations found significant increases in maternal Rh-negativity among children with neurodevelopmental disorders (NDs), including ASD (Geier and Geier 2007a, b; Geier et al. 2008; Holmes et al. 2003). However, Johnson & Johnson, a manufacturer of RhoGam, approached Dr. Judith Miles and her department at the University of Missouri with a significant grant to help defend them from litigation. The industry-sponsored study by Miles and Takahashi (2007) commenced and concluded that exposure to ethylmercury (or Thimerosal) from RhoGam was not associated with ASD (Miles and Takahashi 2007).

In ASD, the stakes for industry are particularly high, with millions of children affected globally (DeSoto and Hitlan 2010). As mentioned, more than one industry views this issue through the lens of their own potential culpability, the coal burning industry which expels mercury into the air and the pharmaceutical industry which uses Hg as a preservative in some vaccines. However, the issue of conflicts of interest in research that examines the relationship between Hg exposure and ASD is different from the typical toxicants and products previously mentioned in that the public health sector, a powerful and influential global and governmental alliance, views this issue through the lens of its own potential culpability. According to internal documents, public health officials are concerned that negative information about Thimerosal (the Hg-based preservative used in some vaccines), if substantiated, might damage the vaccine program, for which the public health system has a vested interest in vaccine distribution and uptake (Association of American Physicians and Surgeons, Inc. 2005). As reported by the United States Congressional Report of 2003 in regard to the issue of thimerosal and ASD, “Our public health agencies’ failure to act is indicative of institutional malfeasance for self-protection and misplaced protection of the pharmaceutical industry.” (Burton 2003).

Additionally, the public health entity, the US Centers for Disease Control and Prevention (CDC), receives millions of dollars in industry gifts and funding, including substantial support from the pharmaceutical industry (Lenzer 2015; Smith et al. 2012). According to Lenzer (2015), numerous manufacturers give donations to the CDC through the CDC Foundation. For example, in 2012–2013 Janssen donated \$1.5 million and in 2011–2012 contributors included Merck (\$915,149), Genzyme (\$762,000), Sanofi-Aventis (\$600,000), and Abbott Laboratories (\$550,000) (Lenzer 2015; Smith et al. 2012). This significant financial relationship further amplifies the potential for conflict of interest on the part of the CDC.

The issue of conflict of interest in ASD can be illustrated by an examination of the published scientific literature. A systematic literature search of original studies from 1999 to date (August 2015) using the search terms “autism and mercury” reveals evidence of this bias. The results of this search are listed and briefly described in Tables 1 and 2. Table 1 shows the studies on Thimerosal (or mercury) and ASD which were sponsored or co-sponsored by those *with* public health, pharmaceutical industry, or coal burning affiliation, which represent a conflict of interest. Table 2 shows the studies on Thimerosal (or mercury) and ASD that were conducted by independent researchers *without* public health or industry affiliation.

Similar to historical debates about other toxicants, the findings reveal, that research with an apparent conflict of interest shows a bias toward the null hypothesis

**Table 1** Studies that examined the relationship between Thimerosal (or Hg) and autism that were sponsored or co-sponsored by public health and/or had industry affiliation; 12/14 = 86 % failed to reject the null hypothesis, i.e., no relationship between Hg and ASD

| Study                                               | Evaluation                                                                                                      | Conclusion                                                                                                                  | Affiliation with public health or industry     | Found effect |
|-----------------------------------------------------|-----------------------------------------------------------------------------------------------------------------|-----------------------------------------------------------------------------------------------------------------------------|------------------------------------------------|--------------|
| Verstraeten et al. (2003)<br>Pediatrics             | Assessed the possible toxicity of TCVs to infants                                                               | No analyses found significant increased risks for autism                                                                    | Yes<br>Public health                           | No           |
| Madsen et al. (2003)<br>Pediatrics                  | TCVs in Denmark and evidence of autism                                                                          | Data do not support a correlation between TCVs and autism                                                                   | Yes<br>Public health and industry <sup>a</sup> | No           |
| Stehr-Green et al. (2003)<br>Am. J. Pre Med         | TCVs and autism                                                                                                 | No correlation between TCVs and autism                                                                                      | Yes<br>Public health and industry <sup>a</sup> | No           |
| Hviid et al. (2003)<br>JAMA                         | To determine whether vaccination with a TM-containing vaccine is associated with autism                         | Results do not support a causal relationship between TCVs and ASD                                                           | Yes<br>Public health and industry <sup>a</sup> | No           |
| Andrews et al. (2004)<br>Pediatrics                 | Relationship between the amount of TM an infant receives via DTP or DT vaccine and NDs (autism) TCVs and autism | No evidence of an association with TM exposure                                                                              | Yes<br>Public health                           | No           |
| Price et al. (2010)<br>Pediatrics                   | TCVs and autism                                                                                                 | No finding of increased risk for any of the ASD outcomes                                                                    | Yes<br>Public health                           | No           |
| Yau et al. (2014)<br>Environ Res                    | Prenatal and early-life exposures to Hg                                                                         | Total Hg in serum collected from mothers during pregnancy and newborn bloodspots were not significantly associated with ASD | Yes<br>Public health                           | No           |
| Windham et al. (2006)<br>Environ Health Perspect    | ASD and environmental exposures, ambient air, San Francisco Bay                                                 | Increased risk of ASD associated with included Hg, cadmium, nickel, trichloroethylene, and vinyl chloride                   | Yes<br>Public health                           | Yes          |
| Schechter and Grether (2008)<br>Arch Gen Psychiatry | Autism prevalence in California after removal of TM from most childhood vaccines                                | Data do not support the hypothesis that exposure to TCVs during childhood is a primary cause of autism                      | Yes<br>Public health                           | No           |

Table 1 continued

| Study                                                   | Evaluated                                                                                                                      | Conclusion                                                                                                                 | Affiliation with public health or industry | Found effect |
|---------------------------------------------------------|--------------------------------------------------------------------------------------------------------------------------------|----------------------------------------------------------------------------------------------------------------------------|--------------------------------------------|--------------|
| De Palma et al. (2012)<br>J Aut Dev Disord              | Heavy toxic metals in autism versus controls                                                                                   | Found no association between autism and hair Hg                                                                            | Yes                                        | No           |
| Wright et al. (2012)<br>PLoS One                        | Urinary (ng/ml) levels between children with ASD and controls, normal ( $n = 121$ ) and with learning disabilities ( $n = 3$ ) | No statistically significant differences were found between children with ASD and controls                                 | Yes<br>Public health                       | No           |
| Dickerson et al. (2015)<br>Sci Total Environ            | ASD prevalence and proximity to industrial facilities releasing arsenic, lead or Hg                                            | Association between urban residential proximity to industrial facilities emitting air pollutants and higher ASD prevalence | Yes<br>Public health                       | Yes          |
| Miles and Takahashi (2007)<br>Am J Med Genet A          | Association between Rh status, RhoGam use in pregnancy and autism                                                              | No association was found between maternal RhoGam use and autism                                                            | Yes<br>Industry <sup>b</sup>               | No           |
| Lewandowski et al. (2009)<br>J Toxicol Environ Health A | Hg exposure from coal-fired power plants and autism in Texas                                                                   | Analysis suggests Hg emissions not consistently associated with autism prevalence in Texas school districts                | Yes<br>Industry <sup>c,d</sup>             | No           |

TCYs Thimerosal-containing vaccines, *RhoGAM* Rho(D) immune globulin, *ASD* autism spectrum disorder, *TM* Thimerosal, *Hg* mercury

<sup>a</sup> Statens Serum Institut (Danish vaccine manufacturer)

<sup>b</sup> Johnson and Johnson Pharmaceutical Company (RhoGam manufacturer)

<sup>c</sup> Gradient, a product defense consulting firm that has received substantial sums from companies to write favorable scientific reports on defending products such as cigarettes and BPA (Keim 2007)

<sup>d</sup> Electric Power Research Institute



**Table 2** Studies that examined the relationship between Thimerosal (or Hg) that were conducted by independent researchers *without* public health or industry affiliation; 12/62 = 19 % failed to reject the null hypothesis, i.e., no relationship between Hg and ASD

| Study/Journal                                           | Evaluated                                                                                                                                 | Conclusion                                                                                                                                                                                                                                                                | Affiliation with public health or industry | Found effect |
|---------------------------------------------------------|-------------------------------------------------------------------------------------------------------------------------------------------|---------------------------------------------------------------------------------------------------------------------------------------------------------------------------------------------------------------------------------------------------------------------------|--------------------------------------------|--------------|
| Rose et al. (2015)<br>J Toxicol                         | Human LCLs autism versus controls exposed to TM                                                                                           | Autism LCLs exhibited greater reduction in ATP-linked respiration, maximal respiratory capacity, and reserve capacity, compared to control LCLs                                                                                                                           | No                                         | Yes          |
| Geier et al. (2015)<br>Biol Trace Elem Res              | Risk of a PDD following TM exposure from Hib                                                                                              | Cases of autism/PDD were significantly more likely to have had TM exposure from Hib                                                                                                                                                                                       | No                                         | Yes          |
| Geier et al. (2014b)<br>J Biochem Pharmacol Res         | Risk of a ND following TM exposure from DTaP                                                                                              | Cases of autism were significantly more likely to have had TM exposure from DTaP                                                                                                                                                                                          | No                                         | Yes          |
| Geier et al. (2014a)<br>Int J Environ Res Public Health | Dose dependent relationship between TM exposure and NDs                                                                                   | Cases of autism/PDD more likely than controls, per microgram of TM exposure                                                                                                                                                                                               | No                                         | Yes          |
| Alabdali et al. (2014)<br>Behav Brain Func              | Concentration of two toxic heavy metals, lead and Hg were measured in red blood cells, plus glutathione-s-transferase (GST) and vitamin E | ASD had significantly higher Pb and Hg levels and lower GST activity and vitamin E concentrations compared with the controls. The levels of heavy metals (Hg and Pb), GST and vitamin E were correlated with the severity of the social and cognitive impairment measures | No                                         | Yes          |
| Macedoni-Lukšič et al. (2015)<br>Biol Trace Elem Res    | levels of metals in blood aluminum, lead, Hg in ASD compared to children with neurological disorders                                      | No significant differences in blood levels of metals between the groups was found                                                                                                                                                                                         | No                                         | No           |
| Geier et al. (2013)<br>Transl Neurodegener              | Thimerosal-containing vaccine administration as a risk factor for ASD in VAERS and VSD                                                    | Cases of autism were significantly more likely to have had TM exposure from HepB                                                                                                                                                                                          | No                                         | Yes          |

Table 2 continued

| Study/Journal                                          | Evaluated                                                                                                                                                                   | Conclusion                                                                                                                                                                                                                                  | Affiliation with public health or industry | Found effect |
|--------------------------------------------------------|-----------------------------------------------------------------------------------------------------------------------------------------------------------------------------|---------------------------------------------------------------------------------------------------------------------------------------------------------------------------------------------------------------------------------------------|--------------------------------------------|--------------|
| Sharpe et al. (2013)<br>J Toxicol                      | Human lymphocytes in autism versus controls                                                                                                                                 | Autism families showed TM hypersensitivity, none of control individuals displayed this response, the TM concentration required to inhibit cell proliferation in these individuals was only 40 % of controls                                 | No                                         | Yes          |
| Albizzati et al. (2012)<br>Przegl Epidemiol            | Metals in blood, urine and hair samples from children with autism and children with neuropsychiatric disorders, unspecified                                                 | No difference was found between children with autism and children with neuropsychiatric disorders, unspecified                                                                                                                              | No                                         | No           |
| Abdullah et al. (2012)<br>J Aut Dev Disord             | Heavy metals in children's tooth enamel                                                                                                                                     | No significant differences in levels of these neurotoxics for children with ASDs compared with TD children                                                                                                                                  | No                                         | No           |
| Geier et al. (2012)<br>Int J Environ Res Public Health | Hair toxic metal concentrations and ASD severity                                                                                                                            | Increasing hair Hg concentrations significantly correlated with increased ASD severity                                                                                                                                                      | No                                         | Yes          |
| Rahbar et al. (2013)<br>Neurotox Res                   | Investigate the association between blood Hg concentrations in children and ASDs                                                                                            | Found no association between blood Hg concentrations in children and ASDs                                                                                                                                                                   | No                                         | No           |
| Adams et al. (2013)<br>Biol Trace Elem Res             | Investigated both the level of toxic metals in children with autism and the possible association of those toxic metals with autism severity in whole blood, RBCs, and urine | Found strong association of levels of toxic metals with variation in the degree of severity of autism for all the severity scales, with cadmium (whole blood) and Hg (whole blood and RBC) were the most consistently significant variables | No                                         | Yes          |
| van Wijngaarden et al. (2013)<br>Epidemiology          | evaluated the association between prenatal methylHg exposure and ASD phenotype                                                                                              | Prenatal exposure to methylHg was not associated with ASD phenotypic behaviors                                                                                                                                                              | No                                         | No           |

Table 2 continued

| Study/Journal                                    | Evaluated                                                                                                                                                                        | Conclusion                                                                                                                                                                                                                                | Affiliation with public health or industry | Found effect |
|--------------------------------------------------|----------------------------------------------------------------------------------------------------------------------------------------------------------------------------------|-------------------------------------------------------------------------------------------------------------------------------------------------------------------------------------------------------------------------------------------|--------------------------------------------|--------------|
| Yasuda and Tsutsui (2013)<br>Sci Rep             | Hair concentrations of 26 trace elements in children with autistic disorders                                                                                                     | Individuals had high burden of aluminum, cadmium and lead, and 2.8 % or less from Hg and arsenic burden                                                                                                                                   | No                                         | Yes          |
| Blaurock-Busch et al. (2012)<br>Maedica (Buchar) | Examined if PMS treatment reduced heavy metal burden and symptoms in ASD                                                                                                         | Levels of cadmium, Hg, and lead were reduced and ASD symptoms showed improvements                                                                                                                                                         | No                                         | Yes          |
| Blaurock-Busch et al. (2012)<br>Maedica (Buchar) | Assessed the levels of ten toxic metals and essential elements in hair samples of children with autism, and to correlate the level of these elements with the severity of autism | Elevated hair concentrations were noted for aluminum, arsenic, cadmium, Hg, antimony, nickel, lead, and vanadium in autism versus controls                                                                                                | No                                         | Yes          |
| Hodgson et al. (2014)<br>Exp Biol Med (Maywood)  | Investigated redox and methylation metabolites, level of protein homocysteinylation and hair Hg levels in autism and controls                                                    | Hg levels were markedly elevated in the hair of autistic subjects versus control subjects; glutathione in autistic subjects was significantly below control levels, while levels of homocysteine and S-adenosylhomocysteine were elevated | No                                         | Yes          |
| Stamova et al. (2011)<br>Neurotox Res            | Correlations between gene expression and Hg levels in blood of boys with and without autism                                                                                      | Findings suggest different genetic transcription programs associated with Hg in autism compared to controls                                                                                                                               | No                                         | Yes          |
| Blaurock-Busch et al. (2011)<br>Maedica (Buchar) | Exposure to Hg and other heavy metals in children with autism spectrum disorder versus controls                                                                                  | Statistically significant differences in the mean urine levels of aluminum, barium, cerium, Hg, and lead                                                                                                                                  | No                                         | Yes          |
| Obrenovich et al. (2011)<br>Biol Trace Elem Res  | Hair toxic metals in autism versus controls                                                                                                                                      | Abnormal markers of trace metal status, as well as a significant alteration in the deposition of several heavy metal species, particularly arsenic, Hg, copper, and lead, in hair samples between the groups                              | No                                         | Yes          |

Table 2 continued

| Study/Journal                                              | Evaluated                                                                                                                                            | Conclusion                                                                                                                                                                      | Affiliation with public health or industry | Found effect |
|------------------------------------------------------------|------------------------------------------------------------------------------------------------------------------------------------------------------|---------------------------------------------------------------------------------------------------------------------------------------------------------------------------------|--------------------------------------------|--------------|
| Shandley and Austin (2011)<br>J Toxicol Environ Health A   | To test the hypothesis that individuals with a kinetic sensitivity to Hg (pink disease survivors) may be more likely to have descendants with an ASD | Prevalence rate of ASD among the grandchildren of pink disease survivors (1 in 22) to be significantly higher than the comparable general population prevalence rate (1 in 160) | No                                         | Yes          |
| Lakshmi Priya and Geetha (2011)<br>Bio Trace Elem Res      | Lead and Hg in hair and nails autism versus controls                                                                                                 | Significant elevation in the levels of toxic metals lead and Hg in both hair and nail samples in autism versus controls                                                         | No                                         | Yes          |
| Geier et al. (2010)<br>Acta Neurobiol Exp (Warsaw)         | Blood Hg levels in autism and controls                                                                                                               | Hg levels were 1.9-fold significantly increased among subjects diagnosed with an ASD (21.4 microg/L) in comparison to controls (11.4 microg/L)                                  | No                                         | Yes          |
| Hertz-Picciotto et al. (2010)<br>Environ Health Perspect   | Blood Hg levels in autism versus controls                                                                                                            | After accounting for dietary and other differences in Hg exposures, total Hg in blood not statistically different                                                               | No                                         | No           |
| Majewska et al. (2010)<br>Acta Neurobiol Exp               | Levels of hair Hg in autism versus controls                                                                                                          | Autistic children significantly differed from healthy peers in the concentrations of Hg in hair                                                                                 | No                                         | Yes          |
| Gallagher and Goodman (2010)<br>J Toxicol Environ Health A | Association between TM-containing HepB vaccination of male neonates and autism                                                                       | Threefold greater odds for autism diagnosis                                                                                                                                     | No                                         | Yes          |
| James et al. (2009)<br>FASEB J                             | LCLs derived from autistic children and controls, effects of TM on and GSH levels                                                                    | TM resulted in greater increase in GSH/GSSG ratio and increase in free radical generation in autism versus control cells                                                        | No                                         | Yes          |
| Palmer et al. (2009)<br>Health Place                       | Power plant emissions and autism                                                                                                                     | Every 1000 pounds of mercury release, there was a corresponding 2.5 % increase in autism rates and a 3.7 % increase associated with power plant emissions                       | No                                         | Yes          |

Table 2 continued

| Study/Journal                                          | Evaluated                                                                      | Conclusion                                                                                                                                                                    | Affiliation with public health or industry | Found effect |
|--------------------------------------------------------|--------------------------------------------------------------------------------|-------------------------------------------------------------------------------------------------------------------------------------------------------------------------------|--------------------------------------------|--------------|
| Geier et al. (2009)<br>Acta Neurobiol Exp              | Maternal dental amalgams and autism severity                                   | Subjects with > or = 6 amalgams were 3.2-fold significantly more likely to be diagnosed with autism (severe) in comparison to ASD (mild) than subjects with < or = 5 amalgams | No                                         | Yes          |
| Young et al. (2008)<br>J Neuro Sci                     | Ecological study of TM-containing vaccines and risk of NDs                     | Increased risk of an ASD diagnosis with TCVs                                                                                                                                  | No                                         | Yes          |
| Geier et al. (2008)<br>Neuro Endocrin Lett             | Maternal Rh-negativity/TM-containing RhoGAM                                    | Increase in ASD with maternal Rh-negativity                                                                                                                                   | No                                         | Yes          |
| Geier and Geier (2007a)<br>J Matern Fetal Neonatal Med | Maternal Rh-negativity/TM-containing RhoGAM                                    | Increase in ASD with maternal Rh-negativity                                                                                                                                   | No                                         | Yes          |
| Geier and Geier (2007b)<br>J Toxicol Environ Health A  | Regressive autism and TM exposure                                              | Significant dose-response relationship between the severity of the regressive ASDs and total Hg dose children received from TCVs/RhoGAM                                       | No                                         | Yes          |
| Zhang and Wong (2007)<br>Environ Int                   | Examined Hg exposure increases in China                                        | Exposure suggests an increase in autism related to increasing Hg exposure                                                                                                     | No                                         | Yes          |
| Adams et al. (2007)<br>J Toxicol Environ Health A      | Level of Hg, lead, and zinc in baby teeth in autism versus controls            | Children with autism had significantly (2.1-fold) higher levels of Hg                                                                                                         | No                                         | Yes          |
| Soden et al. (2007)<br>Clin Toxicol (Phila)            | 24-Hour provoked urine excretion test for heavy metals in children with autism | Excess chelatable body burden of As, Cd, Pb, or Hg is zero                                                                                                                    | No                                         | No           |
| DeSoto and Hitlan (2007)<br>J Child Neurol             | Re-analysis of Ip study data (mentioned below)                                 | Significant relation does exist between the blood levels of Hg and ASD; in the autistic group, severity of autism was inversely related to hair Hg levels                     | No                                         | Yes          |

Table 2 continued

| Study/Journal                                        | Evaluated                                                                                          | Conclusion                                                                                                                                                                             | Affiliation with public health or industry | Found effect |
|------------------------------------------------------|----------------------------------------------------------------------------------------------------|----------------------------------------------------------------------------------------------------------------------------------------------------------------------------------------|--------------------------------------------|--------------|
| Walker et al. (2006)<br>Neurotoxicology              | Heat shock protein transcripts and MT exposure to TM in autism versus controls                     | No apparent differences between autistic and non-autistic sibling responses in this very small sampling group                                                                          | No                                         | No           |
| Singh and Hanson (2006)<br>Pediatr Allergy Immunol   | Metallothionein (MT) and anti-MT in autism and controls exposed to TCV's                           | MT and anti-MT were no different suggesting no TM induced MT-autoimmunity in autism                                                                                                    | No                                         | No           |
| Palmer et al. (2006)<br>Health Place                 | Hg release, special education rates, and autism disorder                                           | Association between environmentally released Hg and special education rates were fully mediated by increased autism rates                                                              | No                                         | Yes          |
| Al-Ayadhi (2005)<br>Neurosciences (Riyadh)           | Hair metals in autism versus controls                                                              | Higher levels of toxic heavy metals Hg, lead, arsenic, antimony and cadmium in autistic spectrum disorders as compared to the controls                                                 | No                                         | Yes          |
| Geier and Geier (2006)<br>J Toxicol Environ Health A | Dose (50 vs. 25 micrograms) of Hg from TM in VAERS                                                 | Increased odds ratios for autism with higher doses of TM                                                                                                                               | No                                         | Yes          |
| Fido and Al-Saad (2005)<br>Autism                    | Toxic metals in the hair of children with autism differ from age- and sex-matched healthy controls | Children with autism had significantly ( $p < .001$ ) higher in-hair concentration levels of lead, Hg, and uranium.                                                                    | No                                         | Yes          |
| Geier and Geier (2005)<br>Med Sci Monit              | Association between TCV's DTaP comparison to TM-free DTaP and autism in VAERS and VSD              | Exposure to Hg from TCV's administered in the US was a consistently significant risk factor for autism                                                                                 | No                                         | Yes          |
| Geier and Geier (2003a)<br>Pediatr Rehabil           | Dose of TCV's and autism in VAERS and USDE data                                                    | Dose-response curves showed increases in odds ratios of NDs (autism) in both VAERS and USDE closely and nearly correlated with increasing doses of TCV's containing childhood vaccines | No                                         | Yes          |

Table 2 continued

| Study/Journal                                         | Evaluated                                                                                                                                                     | Conclusion                                                                                                                                                                                            | Affiliation with public health or industry | Found effect |
|-------------------------------------------------------|---------------------------------------------------------------------------------------------------------------------------------------------------------------|-------------------------------------------------------------------------------------------------------------------------------------------------------------------------------------------------------|--------------------------------------------|--------------|
| Geier and Geier (2003b)<br>Exp Biol Med               | TM-DTPa and NDs in VAERS                                                                                                                                      | An association was found between TM-DTPa and autism                                                                                                                                                   | No                                         | Yes          |
| Vojdani et al. (2003)<br>Int J Immunopathol Pharmacol | Measured IgG, IgM and IgA antibodies against CE6, C69, streptokinase, gliadin and casein peptides and against ethyl Hg bound to human serum albumin in autism | TM binds to lymphocyte receptors and/or tissue enzymes, resulting in autoimmune reaction in children with autism                                                                                      | No                                         | Yes          |
| Ip et al. (2004)<br>J Child Neurol                    | Hair and blood Hg levels and autism in autism                                                                                                                 | No difference in the mean Hg levels                                                                                                                                                                   | No                                         | No           |
| Singh and Rivas (2004)<br>J Biomed Sci                | A study of Hg-induced antinuclear and antilamin antibodies in autistic and normal children who had been pre-administered with TCVs                            | Serum level of these two autoimmune markers did not significantly differ between autistic and normal children                                                                                         | No                                         | No           |
| Geier and Geier (2004)<br>Med Sci Monitor             | Hg doses from TCVs on population prevalence of autism                                                                                                         | Evidence showing a direct relationship between increasing doses of Hg from TCVs and autism                                                                                                            | No                                         | Yes          |
| Blanchard et al. (2011)<br>Rev Environ Health         | Occurrence of autism as related to distribution of Hg in ambient air                                                                                          | Risk of autism is greater in the geographic areas of high levels of ambient Hg                                                                                                                        | No                                         | Yes          |
| Mrozek-Budzyn et al. (2011)<br>Przegl Epidemiol.      | To determine an association of TCVs exposure with the risk of autism                                                                                          | No evidence of an association between TCVs and autism                                                                                                                                                 | No                                         | No           |
| Holmes et al. (2003)<br>Int J Toxicol                 | Relationship between autism and hair Hg levels                                                                                                                | Hg levels statistically different from controls and correlated with symptom severity. Mothers in the autistic group had significantly higher levels of Hg exposure through RhoGam and amalgam filling | No                                         | Yes          |

Table 2 continued

| Study/Journal                                               | Evaluated                                                                                                                     | Conclusion                                                                                                                                                                                                                                                                                                                                                              | Affiliation with public health or industry | Found effect |
|-------------------------------------------------------------|-------------------------------------------------------------------------------------------------------------------------------|-------------------------------------------------------------------------------------------------------------------------------------------------------------------------------------------------------------------------------------------------------------------------------------------------------------------------------------------------------------------------|--------------------------------------------|--------------|
| Mostafa and AL-Ayadhi (2015)<br>Clin Cell Immunol           | Blood Pb levels and seropositivity of anti-MBP auto-antibodies in autistic children                                           | Serum levels of blood Hg were significantly higher in autistic children than healthy controls; increased levels of blood Hg were found in 48 % of autistic patients, and 72 % of autistic children had anti-MBP auto-antibodies. There was a significant positive association between the elevated levels of blood Hg and anti-MBP auto-antibodies in autistic children | No                                         | Yes          |
| Yassa (2014)<br>Environ Toxicol Pharmacol                   | Blood and hair samples from 15 children from Upper Egypt with autism, 2–14 years of age and 45 controls in the same age range | High level of Hg and lead among those kids with autism, with significant decline in the blood level of lead and Hg with the use of DMSA as a chelating agent                                                                                                                                                                                                            | No                                         | Yes          |
| Khan et al. (2014)<br>J Physiol Pharmacol                   | Brain Hg levels measured in extracortical regions autism versus controls                                                      | Brain Hg levels measured in extracortical regions in children with autism versus controls were not different                                                                                                                                                                                                                                                            | No                                         | No           |
| Roberts et al. (2013)<br>Environ Health Perspect            | Associations between US EPA-modeled levels of hazardous air pollutants at time and place of birth and ASD                     | Overall measure of metals were significantly associated with ASD, with odds ratios ranging from 1.5 (for overall metals measure) to 2.0 (for diesel and Hg)                                                                                                                                                                                                             | No                                         | Yes          |
| Mostafa and Refai (2007)<br>Egypt J Pediatr Allergy Immunol | Serum antineuronal antibodies and blood Hg levels were estimated between autism and controls                                  | Higher seropositivity for antineuronal antibodies and higher blood Hg in autism versus controls. Seropositivity of antineuronal antibodies had positive association with elevated blood Hg (found in 70 % of autistic children). Both markers positively associated with behavioral abnormalities, autistic regression, EEG abnormalities                               | No                                         | Yes          |



Table 2 continued

| Study/Journal                                    | Evaluated                                                                                                     | Conclusion                                                                                                                                                              | Affiliation with public health or industry | Found effect |
|--------------------------------------------------|---------------------------------------------------------------------------------------------------------------|-------------------------------------------------------------------------------------------------------------------------------------------------------------------------|--------------------------------------------|--------------|
| Biamonte et al. (2014)<br>Neurotoxicology        | Mice exposed to MeHg during the prenatal and early postnatal period, either at subtoxic dose or at toxic dose | Higher MeHg dose caused dramatic reduction of PCs in all mice and "autism-like" features (loss of sociability, preference for sameness) in genetically susceptible mice | No                                         | Yes          |
| Bradstreet et al. (2003)<br>J Am Phys Surgeons   | Children with ASD and controls treated with multiple doses of DMSA                                            | Children with ASD excreted six-fold greater Hg than controls                                                                                                            | No                                         | Yes          |
| DeSoto and Hitlan (2012)<br>J Environ Protection | Examined Hg-related fish advisory and rate of autism                                                          | Hg-related fish advisories are found to be a strong predictor of a state's autism rate, $r = 0.48, p < 0.001$                                                           | No                                         | Yes          |

ASD autism spectrum disorder, ND neurodevelopmental disorder, LCL lymphoblastoid cell lines, TM Thimerosal, PDD pervasive developmental disorder, Hib haemophilus influenzae type b vaccine, DTap diphtheria, tetanus, acellular pertussis, Hepatitis B vaccine, Rho(D) immune globulin, VAERS vaccine adverse events reporting system, VSD vaccine safety data link, USDE US Department of Education, GSH glutathione, TCVs Thimerosal-containing vaccines, MT metallothionein, DMSA dimercaptosuccinic acid, anti-MBP anti-myelin basic protein, EPA Environmental Protection Agency, RBC red blood cells, MeHg methylHg, PCs purkinje cells, TD typically developing, DMSA 2,3-dimercaptosuccinic acid, Hg mercury

or “no effect” (i.e., no relationship between Hg and ASD). Of the studies *with* public health or industry affiliation, 86 % (12/14) failed to reject the null hypothesis (Table 1). However, of the studies *without* public health or industry affiliation, only 19 % (12/62) failed to reject the null hypothesis. In other words, over 80 % of the studies *without* public health or industry affiliation found evidence a relationship between Hg exposure and ASD (Table 2). The dramatic discrepancy in these results, 86 versus 19 %, provides evidence of biased outcomes, indicative of a conflict of interest.

## The Need for Transparency in Autism Research

As mentioned earlier, the stakes in the ASD debate are high. In the past two decades, there has been a dramatic increase in ASD rates, with a 262 % increase from 4.2 per 1000 in 1996 to 15.5 per 1000 in 2010 (Van Nardun & Maun et al. 2015). ASD is considered to have reached epidemic proportions and is an issue of high national and international concern. The critical importance of this debate only heightens the urgent need for transparency in autism research.

Transparency in autism research, including access to research datasets used, would provide for the review and evaluation of studies and the partiality or impartiality which characterized them, and encourage a system of checks and balances. When study findings are deemed inaccurate and/or biased, transparency in autism research would allow for either confirmation or correction. For instance, in 2004, Ip et al. published a study comparing blood and hair Hg levels in children with ASD and controls, reporting that there was no difference in the mean Hg levels. However, other scientists noted that there did appear to be a significant difference in the mean Hg levels between the groups and subsequently requested the data. Upon re-analysis, the data revealed that there was indeed a significant difference in the mean mercury levels between children with ASD and controls (DeSoto and Hitlan 2007). The authors of the re-analysis stated: “If there is any link between autism and mercury, it is absolutely crucial that the first reports of the question are not falsely stating that no link occurs.”

As another instance, Dr. Polly R. Sager, Division of Microbiology and Infectious Disease, National Institute of Allergy and Infectious Disease (NIADI), US National Institutes of Health (NIH), made a presentation, “NIAID Studies on Thimerosal” to the Institute of Medicine of the US National Academy of Sciences on February 9, 2004 (IOM 2004). In her presentation, she presented crucial evidence on the comparative distribution and persistence of Hg in the brain and blood following methyl-Hg and Thimerosal administration to infant monkeys mimicking the US childhood vaccine schedule of the 1990s by other investigators (Burbacher et al. 2005). It was later discovered following Dr. Sager’s presentation that she misrepresented data on the true extent that Hg distributed and persisted in the monkey brain following Thimerosal administration. She was eventually forced to supply in her own words, “Corrected Slide Submitted to IOM May 3, 2004”. However, even with the corrections, errors still were present in the “Corrected Slide” and the information still did not reflect that data ultimately published by the

study investigators (Burbacher et al. 2005). As a consequence, the IOM, in evaluating the relationship between Thimerosal exposure and ASD risk, was unable to consider accurate and true data as to the distribution and persistence of Hg in the monkey brain following Thimerosal administration mimicking the US childhood vaccine schedule of the 1990s.

### Examples of Studies that Illustrate the Importance of Transparency in Autism Research

A number of ASD and Hg studies, sponsored by entities with an apparent conflict of interest, appear to have arrived at questionable conclusions. Moreover, the authors of these studies have, unfortunately, failed to make their datasets available to others for further evaluation, exemplifying the need for transparency in autism research.

As expressed by Baskin and Gross (2015), editors of the journal *Neurology* on the need for greater transparency in research in general: “The responsibility for promoting greater openness in research falls not only to the individuals performing the work, but to the funders of the work (including government, foundation, and industry sponsors), institutions where the work is being done, and to journal editors and peer reviewers, who do the final check on the quality of the research before it is released to readers.” The following examples illustrate this point.

#### Verstraeten et al. (2000, 2003)

In the late 1990s, in a study sponsored by the CDC, Verstraeten et al. (2000) “categorized the cumulative ethyl-Hg exposure from [T]himerosal[-]containing vaccines after one month of life and assessed the subsequent risk of degenerative and developmental neurologic disorders and renal disorders before the age of six.” The authors applied proportional hazard models adjusting for HMO, year of birth, and gender, and they excluded premature babies. The original reported results showed that the relative risk (RR) of developing a neurologic development disorder was 1.8 [95 % confidence intervals (CI) 1.1–2.8] when comparing the highest exposure group at 1 month of age (cumulative dose >25 µg) to the unexposed group. Similarly, they “...also found an elevated risk for the following disorders: autism (RR 7.6, 95 % CI 1.8–31.5), non-organic sleep disorders (RR 5.0, 95 % CI 1.5–15.9), and speech disorders (RR 2.1, 95 % CI 1.1–4.0)” in the highest exposure group. The results were presented to the Epidemic Intelligence Service Annual Conference, CDC in Atlanta, GA, in 2000, but it remained as an abstract and was never published as a full paper (Verstraeten et al. 2000).

However, the subsequently published results from this study diverged from the aforementioned results presented in 2000 (Bernard 2004; Put Children First 2006). In the published study, Verstraeten et al. (2003) concluded that “No consistent significant associations were found between TCVs and neurodevelopmental outcomes” When the dataset was requested by independent researchers with the help of the United States Congress, the dataset, according to the CDC was “destroyed” (personal communication, Stuart Burns on behalf of Congressman

Weldon 2003). Explaining the unavailability of this dataset, the Institute of Medicine (IOM) stated: “Analytic data files from some previously published VSD studies had not been archived in a standard manner, so it was difficult to respond expeditiously to requests to reanalyze published VSD studies.” (IOM 2005).

#### **Yau et al. (2014)**

In 2013 Yau et al., in conjunction with the California Department of Public Health, submitted a study to the *Journal of Autism and Developmental Disorders*, entitled “Prenatal and neonatal peripheral blood Hg levels and autism spectrum disorders.” The study was rejected by reviewers because the results did not match the conclusions. The conclusion stated by the authors was that the “Results indicate that levels of total mercury in serum collected from mothers during mid-pregnancy and from newborn bloodspots were not significantly associated with risk of ASD.” However, in Table 2 of the study, the geometric mean maternal serum Hg concentrations between the general population (0.32) and the ASD group (0.48) had a P value of 0.05. Thus, maternal serum blood Hg levels were significantly higher in the ASD group than in the general population, although the study authors failed to state this. The study was published later in the journal *Environmental Research* without addressing this issue. To date, the California Department of Public Health (CDPH), University of California at Davis (UC Davis), Kaiser Permanente, as well as individual authors, have failed to release the study dataset for further evaluation despite receiving numerous requests for the information. The CDPH stated that they did not have the complete dataset and that they are required to make sure the data are destroyed after the studies are over (personal communication, Dr. Martin Kharrazi, CDPH, 6/25/2015). UC Davis refused to release the dataset claiming, “researcher’s privilege, based upon a strong Constitutional interest in the right of scholars to conduct research without interference, an aspect to the academic freedom recognized as a special concern of the First Amendment.” (Personal communication, Michele M. McCuen, Legal Analyst, Office of the Campus Counsel, Office of the Chancellor and Provost, University of California, 8/21/2015). Kaiser Permanente refused to release the dataset claiming, “The Freedom of Information Act (FOIA) only applies to federal agencies. It does not apply to an institution like I.P.” (Personal communication, Caroline Milner, National Research Compliance Officer, National Compliance in Research Program, Kaiser Foundation Research Institute, 8/7/2015).

#### **Uno et al. (2015)**

In 2015, Uno et al. published a study in the journal *Vaccine* investigating the relationship between the risk of ASD and early exposure to the combined Measles–Mumps–Rubella (MMR) vaccine and the relationship between Thimerosal from vaccinations in Japanese children. The authors concluded that there were no significant differences in the timing of MMR vaccination or Thimerosal dosage between cases and controls for any age group. However, there was a statistical error that nullified the conclusions offered by the authors. This error was found in Table 2

at 24 months of age. From the values provided in Table 2 of the study (see below), it was evident that the difference between cases and controls at 24 months was indeed statistically significant with a high degree of confidence. Thus, there was a statistically significant yet unacknowledged relationship between Thimerosal exposure and the risk of ASD. The journal *Vaccine* was notified of the error.

From the originally provided data, the following results were documented for children age 24 months: Unpaired *t* test mean of \* sample 1 from summary data = 804.2 (n = 189) mean of \* sample 2 from summary data = 632.1 (n = 224).

Assuming equal variances, the combined standard error = 71.8, *df* = 411, *t* = 2.40 one sided *p* = 0.0085 two sided *p* = 0.017, 95 % confidence interval for difference between means = 30.88–313.32 power (for 5 % significance) = 90.07 %.

Assuming unequal variances, the combined standard error = 72.06, *df* = 394.17, *t*(*d*) = 2.39 one sided *p* = 0.0087 two sided *p* = 0.0174, 95 % confidence interval for difference between means = 30.45–313.75 power (for 5 % significance) = 66.35 %.

When the journal *Vaccine* was made aware of the statistical error, it notified the authors. In response to this notification, the authors changed the data values (mean and standard deviation) for the controls in Table 2 at 24 months from 632.1 (715.1) to 676.8 (719.5) in their study, as summarized in Fig. 1. Thus, the data was changed in order to maintain the original and erroneous conclusion. In essence, the conclusion determined the data, rather than the data determining the conclusion. However, no explanation for the error or justification for the change was given. To date, the journal *Vaccine* and the study authors have refused requests to release the study dataset for further evaluation. Although there was never a response from any of the study authors, the journal *Vaccine* stated (in response to the notification of the

**ORIGINAL TABLE 2**

**Data is 632.1 (715.1) but the difference is actually statistically significant (p = 0.017)**

**Table 2**  
Cumulative exposure to thimerosal according to exposure period.

| Age (months) | Cumulative exposure amount, µg |         |                  |         | p-value |
|--------------|--------------------------------|---------|------------------|---------|---------|
|              | Cases (n=189)                  |         | Controls (n=224) |         |         |
|              | Mean (SD)                      | Min-Max | Mean (SD)        | Min-Max |         |
| 1            | 1.3 (18.2)                     | 0-250   | 0 (0)            | 0-0     | 0.28*   |
| 3            | 1.3 (18.2)                     | 0-250   | 2.2 (33.4)       | 0-500   | 0.73*   |
| 6            | 10.6 (84.9)                    | 0-750   | 16.7 (120.7)     | 0-1500  | 0.54*   |
| 12           | 172.0 (457.1)                  | 0-2250  | 112.1 (372.8)    | 0-1800  | 0.15*   |
| 18           | 412.7 (627.1)                  | 0-2250  | 348.7 (605.2)    | 0-2100  | 0.29*   |
| 24           | 804.2 (741.6)                  | 0-2250  | 632.1 (715.1)    | 0-2250  | 0.08*   |
| 36           | 1314.8 (796.5)                 | 0-2750  | 1389.3 (583.5)   | 0-2750  | 0.29*   |

**REVISED TABLE 2**

**Data is now changed to 676.8 (719.5) in order to maintain a p value of 0.08.**

**Table 2**  
Cumulative exposure to thimerosal according to exposure period.

| Age (months) | Cumulative exposure amount, µg |         |                  |         | p-value |
|--------------|--------------------------------|---------|------------------|---------|---------|
|              | Cases (n=189)                  |         | Controls (n=224) |         |         |
|              | Mean (SD)                      | Min-Max | Mean (SD)        | Min-Max |         |
| 1            | 1.3 (18.2)                     | 0-250   | 0 (0)            | 0-0     | 0.28*   |
| 3            | 1.3 (18.2)                     | 0-250   | 2.2 (33.4)       | 0-500   | 0.73*   |
| 6            | 10.6 (84.9)                    | 0-750   | 16.7 (120.7)     | 0-1500  | 0.54*   |
| 12           | 172.0 (457.1)                  | 0-2250  | 112.1 (372.8)    | 0-1800  | 0.15*   |
| 18           | 412.7 (627.1)                  | 0-2250  | 348.7 (605.2)    | 0-2100  | 0.29*   |
| 24           | 804.2 (741.6)                  | 0-2250  | 676.8 (719.5)    | 0-2250  | 0.08*   |
| 36           | 1314.8 (796.5)                 | 0-2750  | 1389.3 (583.5)   | 0-2750  | 0.29*   |

**Fig. 1** Changing data in Table 2 from Uno et al. (2015) after the authors were notified of a statistical error. Changing the data allowed the authors to maintain their conclusion of no association between ASD and Thimerosal

error and the request for the dataset) that, “Following the feedback from your group, the authors have made a minor correction to Table 2 and an acknowledgement thereof is made in the article. We are grateful for sharing your observations with us. As appropriate action has been undertaken, we now consider this matter to be resolved.” (Personal communication, Alina Helsloot, Executive Publisher Immunology and Microbiology, Elsevier and Dr. Gregory Poland, Editor in Chief, Vaccine, 4/9/2015).

### **Curtis et al. (2015)**

In 2015 Curtis et al., including employees from public health, published a study titled: “Examination of the Safety of Pediatric Vaccine Schedules in a Non-Human Primate Model: Assessments of Neurodevelopment, Learning, and Social Behavior.” The study examined the safety of pediatric vaccine schedules in a non-human primate model, and they concluded that the results, “...provided no consistent evidence of neurodevelopmental deficits or aberrant behavior in vaccinated animals.” However, the data presented in the study did not match the conclusions. As one researcher (Dr. Dan Laks) stated on PubMed Commons: “Supplementary Figure 5 clearly shows a drastic reduction in learning in the Thimerosal exposed group. The authors’ discussion: ‘In the present study animals in the TCV group appeared to perform poorer than controls in learning set testing but showed little evidence that their responses had organized in a strategy that was different from that of the control group. In fact, the reported difference was only found in the overall mean averaged across all of the blocks and trials, not in their learning across trials or blocks, which is the outcome needed to indicate a strategy difference.’ But in fact, a deficit in learning seems to be in multiple groups, for if one looks at group E, there seems to be a slope difference from the control signifying a key difference between exposures for learning strategy. These results are not reported. Perhaps Supplemental Figure 5 results should have been the title of this study instead: ‘Ethylmercury from vaccines reduces learning capacity.’”

Based on the clear difference between the data and the conclusions, a request for the dataset was submitted. To date, the University of Texas Southwestern Medical Center (UTSW) and the Johnson Center for Child Health and Development, as well as individual authors of the study, have failed to release the study dataset for further evaluation. UTSW stated that because Dr. Hewitson, the lead researcher on the study was volunteer faculty, they did not “...have any influence or control over her or her data.” (Personal communication, Carol Tamminga, MD, UTSW, 5/8/2015). The Johnson Center for Child Health & Development stated that, “Given the size and scope of the project (and the multiple data sets involved) it would be a great undertaking to appropriately and adequately coordinate another review of these data sets. It would require the ability to read the data (requiring the acquisition of several specific, proprietary software licenses), the adequate and appropriate personnel to interpret the data (requiring PhD level statisticians and PhD level scientists with experience in interpreting discrimination learning and social behavior in animals), and it would require a significant amount of funding to cover not only these items, but also the significant amount of time that would be required of the statisticians and

researchers who completed this original project in order to review and have knowledge of the procedures of the study and the scope of the data sets (as well as the time involved to extract the data).” (Personal communication, Anissa Ryland, Executive Director, The Johnson Center for Child Health & Development, 4/2/2015).

## Summary and Conclusion

Historically, entities/industries with a vested interest in a product whose safety is in dispute have consistently used research to back their claims that a product is safe. The effects of a funding source on research outcomes have been examined, and it has been shown that industry or responsible entity affiliated studies are far more likely to yield outcomes favorable to that industry/entity (Boone et al. 2014). When this conflict of interest influences research, the resulting scientific debate on products, toxicants, etc. can be confounded by misleading information. Indeed, this is precisely the outcome desired by the sponsors of such conflicted research.

A conflict of interest in autism research has been noted, particularly when examining Hg exposure and the risk of ASD (DeSoto and Hitlan 2010). However, conflicts of interest in this debate are different from other cases because not only industries (e.g., the coal-burning industry and the pharmaceutical industry), but also public health institutions view this issue through the lens of their own potential culpability. Further complicating the matter is the fact that public health entities often control access to the relevant datasets. Indeed, a systematic examination of the research literature in the Hg-autism debate shows that research funded by these conflicted entities is more likely to yield conclusions favorable to that industry/entity, finding no relationship between Hg exposure and the risk of ASD.

Transparency in autism research is of utmost importance. The current examples of studies offering questionable conclusions clearly illustrate the need for openness and accountability. ASD is an issue of high national and international concern, where the stakes are high, and researchers and policymakers need to be cognizant of the issue of conflicts of interest in autism research (DeSoto and Hitlan 2010).

One way of achieving improved openness and transparency in autism research would be to require authors, journals, and funding sources to require greater openness and data sharing. As mentioned, the responsibility for promoting greater openness in research falls not just to the authors, but to the funders, institutions, and journal editors (Baskin and Gross 2015). The examples provided in this analysis suggest that some authors, journals, and institutions could improve in the area of helping to promote greater openness.

The Proceedings of the National Academy of Sciences of the United States of America (PNAS) has developed and adopted standards concerning the responsibilities of authorship in the biological sciences. It is referred to as the Uniform Principle for Sharing Integral Data and Materials Expeditiously or “UPSIDE”. In October of 2001, National Academies committee evaluated the responsibilities of authors to share data and materials referenced in their publications, the role of journals to impose requirements for data and material sharing, and whether a

common set of requirements for sharing does or should exist (Cozzarelli 2001, 2004; Cech 2003). They established that authors are obligated to release data and materials to enable others to verify or replicate published findings. They stated that one “upside” to this is it keeps science honest (Cozzarelli 2001, 2004; Cech 2003). In an article by Nicholas R. Cozzarelli, Editor-in-Chief of PNAS, he described some of the comments of the board members and these comments may be relevant to the current discussion (Cozzarelli 2001). Two of the comments are as follows:

I am one of the few people here who represents the private sector at this point, and I would love to be able to publish in prestigious journals and withhold the data. But I think it is wrong.

Scientific journals should play no role in the protection of the private interests of authors, or in shielding data from the community. Protection is far from the mission of journals, and shielding is antithetical to it.

Identifying causative factors for ASD is already a challenging task for the scientific community, demanding the highest standards of openness and transparency. Any departure from these standards represents a disservice to all.

**Acknowledgments** This study was supported by the non-profit 501(c)(3) Institute of Chronic Illnesses, Inc., and the non-profit 501(c)(3) CoMeD, Inc.

#### Compliance with Ethical Standards

**Conflict of interest** There are no competing financial interests. The authors have been involved in vaccine/biologic litigation.

**Open Access** This article is distributed under the terms of the Creative Commons Attribution 4.0 International License (<http://creativecommons.org/licenses/by/4.0/>), which permits unrestricted use, distribution, and reproduction in any medium, provided you give appropriate credit to the original author(s) and the source, provide a link to the Creative Commons license, and indicate if changes were made.

## References

- Abdullah, M. M., Lee, A. R., Goldberg, W. A., Clarke-Stewart, K. A., Dudgeon, J. V., Mull, C. G., et al. (2012). Heavy metal in children’s tooth enamel: Related to autism and disruptive behaviors? *Journal of Autism and Developmental Disorders*, *42*(6), 929–936.
- Adams, J. B., Audhya, T., McDonough-Means, S., Rubin, R. A., Quig, D., Geis, E., et al. (2013). Toxicological status of children with autism vs. neurotypical children and the association with autism severity. *Biological Trace Element Research*, *151*(2), 171–180.
- Adams, J. B., Romdalvik, J., Ramanujam, V. M., & Legator, M. S. (2007). Mercury, lead, and zinc in baby teeth of children with autism versus controls. *Journal of Toxicology and Environmental Health Part A*, *70*(12), 1046–1051.
- Alabdali, A., Al-Ayadhi, L., & El-Ansary, A. (2014). A key role for an impaired detoxification mechanism in the etiology and severity of autism spectrum disorders. *Behavioral and Brain Functions*, *10*, 14.
- Al-Ayadhi, L. Y. (2005). Heavy metals and trace elements in hair samples of autistic children in central Saudi Arabia. *Neurosciences (Riyadh)*, *10*(3), 213–218.
- Albizzati, A., Morè, L., Di Candia, D., Saccani, M., & Lenti, C. (2012). Normal concentrations of heavy metals in autistic spectrum disorders. *Minerva Pediatrica*, *64*(1), 27–31.



- Andrews, N., Miller, E., Grant, A., Stowe, J., Osborne, V., & Taylor, B. (2004). Thimerosal exposure in infants and developmental disorders: A retrospective cohort study in the United Kingdom does not support a causal association. *Pediatrics*, *114*, 584–591.
- Association of American Physicians and Surgeons, Inc. (2005). *Selected vaccine authorities from CDC, FDA, and manufacturers discuss, in a closed meeting, the possibility of neurodevelopment disorders resulting from vaccine components*. <http://www.aapsonline.org/vaccines/cdcfdaexperts.htm>. Accessed 05/26/2015.
- Barnoya, J., & Glantz, S. A. (2006). The tobacco industry's worldwide ETS Consultants project: European and Asian components. *The European Journal of Public Health*, *16*(1), 69–77.
- Baskin, P. K., & Gross, R. A. (2015). *Transparency in research and reporting: Expanding the effort through new tools for authors and editors*. Wolters-Kluwer Author Newsletter; Author Resource Review. Accessed 8/17/2015.
- Bernard, S. (2004). Association between thimerosal-containing vaccine and autism. *Journal of the American Medical Association*, *291*(2), 180. (author reply 180–181).
- Biamonte, F., Latini, L., Giorgi, F. S., Zingariello, M., Marino, R., De Luca, R., et al. (2007). Associations among exposure to methylmercury, reduced Reelin expression, and gender in the cerebellum of developing mice. *Neurotoxicology*, *45*, 67–80.
- Björklund, G. (1995). Mercury and acrodynia. *The Journal of Orthomolecular Medicine*, *10*, 145–146.
- Blanchard, K. S., Palmer, R. F., & Stein, Z. (2011). The value of ecologic studies: Mercury concentration in ambient air and the risk of autism. *Reviews on Environmental Health*, *26*(1), 111–118.
- Blaucok-Busch, E., Amin, O. R., Dessoki, H. H., & Rabah, T. (2012). Efficacy of LMSA therapy in a sample of Arab children with autistic spectrum disorder. *Maedica (Buchar)*, *7*(3), 214–221.
- Blaurock-Busch, E., Amin, O. R., Dessoki, H. H., & Rabah, T. (2012). Toxic metals and essential elements in hair and severity of symptoms among children with autism. *Maedica (Buchar)*, *7*(1), 38–48.
- Blaurock-Busch, E., Amin, O. R., & Rabah, T. (2011). Heavy metals and trace elements in hair and urine of a sample of Arab children with autistic spectrum disorder. *Maedica (Buchar)*, *6*(4), 247–257.
- Boone, M. D., Bishop, C. A., Boswell, L. A., Brodman, J. D., Burger, J., Davidson, C., et al. (2014). Pesticide regulation amid the influence of industry. *BioScience*, *64*(10), 917–922.
- Bradstreet, J., Geier, D. A., Kartzinell, J. J., Adams, J. B., & Geier, M. R. (2003). A case-control study of mercury burden in children with autistic spectrum disorders. *Journal of the American Physicians and Surgeons*, *8*, 76–79.
- Brandt, A. M. (2012). Inventing companies of interest: A history of tobacco industry tactics. *American Journal of Public Health*, *102*(1), 63–64.
- Bridbord, K., & Hanson, D. A. (2009). Personal perspective on the initial federal health-based regulation to remove lead from gasoline. *Environmental Health Perspectives*, *117*(8), 1195–1201.
- Brownell, K., & Warner, K. E. (2005). The perils of ignoring history: Big tobacco played dirty and millions died. How big is big food? *The Milbank Quarterly*, *87*(1), 259–294.
- Burbacher, T. M., Shen, D. D., Liberato, N., Grant, K. S., Cernichiari, E., & Clarkson, T. (2005). Comparison of blood and brain mercury levels in infant monkeys exposed to methylmercury or vaccines containing thimerosal. *Environmental Health Perspectives*, *113*(8), 1015–1021.
- Burton, D. O. (2003). US congressional report. Mercury in medicine report. In Committee on Government Reform (Ed.). *Congressional record* (pp. E1011–E1030). United States Congress.
- Cech, T. R. (2003). *Sharing publication-related data and materials: Responsibilities of authorship in the life sciences*. [www.nap.edu/books/0309088593/html](http://www.nap.edu/books/0309088593/html). Accessed 08/28/2015.
- Ceponelli, R. (2001). Unfettered access to published results. *Proceedings of the National Academy of Sciences of the United States of America*, *98*, 8159.
- Cozzarelli, N. R. (2004). UPSIDE: Uniform principle for sharing integral data and materials expeditiously. *Proceedings of the National Academy of Sciences of the United States of America*, *101*(11), 3721–3722.
- Cummings, K. M., Brown, A., & O'Connor, R. (2007). The cigarette controversy. *Cancer Epidemiology, Biomarkers and Prevention*, *16*, 1070–1076.
- Curtis, B., Liberato, N., Rulien, M., Morrisroe, K., Kenney, C., Yutuc, V., et al. (2015). Examination of the safety of pediatric vaccine schedules in a non-human primate model: Assessments of neurodevelopment, learning, and social behavior. *Environmental Health Perspectives*, *123*(6), 579–589.
- Dally, A. (1997). The rise and fall of pink disease. *Social History of Medicine*, *10*(2), 291–304.

- Dathan, J. G., & Harvey, D. D. (1965). Pink disease—10 years after (the epilogue). *British Medical Journal*, *1*(5443), 1181–1182.
- De Palma, G., Catalani, S., Franco, A., Brighenti, M., & Apostoli, P. (2012). Lack of correlation between metallic elements analyzed in hair by ICP-MS and autism. *Journal of Autism and Developmental Disorders*, *42*(3), 342–353.
- Desoto, M. C., & Hitlan, R. T. (2007). Blood levels of mercury are related to diagnosis of autism: A reanalysis of an important data set. *Journal of Child Neurology*, *22*(11), 1308–1311.
- Desoto, M. C., & Hitlan, R. T. (2010). Sorting out the spinning of autism: Heavy metals and the question of incidence. *Acta Neurobiologiae Experimentalis*, *70*(2), 165–176.
- DeSoto, M. C., & Hitlan, R. T. (2012). Fish consumption advisories and the surprising relationship to prevalence rate of developmental disability as reported by public schools. *Journal of Environmental Protection*, *3*(11), 1579–1589.
- Dickerson, A. S., Rahbar, M. H., Han, I., Bakian, A. V., Bilder, D. A., Harrington, R. A., et al. (2015). Autism spectrum disorder prevalence and proximity to industrial facilities releasing arsenic, lead or mercury. *Science of the Total Environment*, *536*, 245–251.
- Draft Recommendations for Cigarette Manufacturers. (1953). *John W. Hill papers, State Historical Society of Wisconsin, Archives Division*. <http://www.tlaonline.com/HKWIS/1963/>. Accessed 11/06/2011.
- Encyclopedia of the Earth. (2009). *Minamata disease*. <http://www.eoearth.org/view/article/154624/>. Accessed 05/08/2015.
- European Commission. (2004). [http://eur-lex.europa.eu/legal-content/EN/TXT/?uri=uriserv:OJ.L\\_.2004.078.01.0053.01.ENG](http://eur-lex.europa.eu/legal-content/EN/TXT/?uri=uriserv:OJ.L_.2004.078.01.0053.01.ENG). Accessed 05/12/2015.
- Fido, A., & Al-Saad, S. (2005). Toxic trace elements in the hair of children with autism. *Autism*, *9*(3), 290–298.
- Friedman, L., & Richter, E. D. (2005). Conflicts of interest and scientific integrity. *International Journal of Occupational Medicine and Environmental Health*, *11*(2), 205–206.
- Gallagher, C. M., & Goodman, M. S. (2010). Hepatitis B vaccination of male neonates and autism diagnosis, NHIS 1997–2002. *Journal of Toxicology and Environmental Health, Part A*, *73*(24), 1665–1677.
- Geier, D. A., Audhya, T., Kern, J. K., & Geier, M. R. (2010). Differences in blood mercury levels in autism spectrum disorders; is there a threshold level? *Acta Neurobiologiae Experimentalis*, *70*, 177–186.
- Geier, D. A., & Geier, M. R. (2003a). An assessment of the impact of thimerosal on childhood neurodevelopmental disorders. *Pediatric Rehabilitation*, *6*(2), 97–102.
- Geier, M. R., & Geier, D. A. (2003b). Neurodevelopmental disorders after thimerosal-containing vaccines: A brief communication. *Experimental Biology and Medicine (Maywood)*, *228*(6), 660–664.
- Geier, D. A., & Geier, M. R. (2004). A comparative evaluation of the effects of MMR immunization and mercury doses from thimerosal-containing childhood vaccines on the population prevalence of autism. *Medical Science Monitor*, *10*(3), PI33–PI39.
- Geier, D. A., & Geier, M. R. (2005). A two-phased population epidemiological study of the safety of thimerosal-containing vaccines: A follow-up analysis. *Medical Science Monitor*, *11*(4), CR160–CR164.
- Geier, D. A., & Geier, M. R. (2006). An evaluation of the effects of thimerosal on neurodevelopmental disorders reported following DTP and Hib vaccines in comparison to DTPH vaccine in the United States. *Journal of Toxicology and Environmental Health, Part A*, *69*(15), 1481–1495.
- Geier, D. A., & Geier, M. R. (2007a). A prospective study of thimerosal-containing Rho(D)-immune globulin administration as a risk factor for autistic disorders. *The Journal of Maternal-Fetal & Neonatal Medicine*, *20*(5), 385–390.
- Geier, D. A., & Geier, M. R. (2007b). A case series of children with apparent mercury toxic encephalopathies manifesting with clinical symptoms of regressive autistic disorders. *Journal of Toxicology and Environmental Health, Part A*, *70*(10), 837–851.
- Geier, D. A., Hooker, B. S., Kern, J. K., King, P. G., Sykes, L. K., & Geier, M. R. (2013). A two-phase study evaluating the relationship between thimerosal-containing vaccine administration and the risk for an autism spectrum disorder diagnosis in the United States. *Translational Neurodegeneration*, *2*(1), 25.
- Geier, D. A., Hooker, B. S., Kern, J. K., King, P. G., Sykes, L. K., & Geier, M. R. (2014a). A dose-response relationship between organic mercury exposure from thimerosal-containing vaccines and

- neurodevelopmental disorders. *International Journal of Environmental Research and Public Health*, 11(9), 9156–9170.
- Geier, D. A., Kern, J. K., & Geier, M. R. (2009). A prospective study of prenatal mercury exposure from maternal dental amalgams and autism severity. *Acta Neurobiologiae Experimentalis (Wars)*, 69(2), 189–197.
- Geier, D. A., Kern, J. K., King, P. G., Sykes, L. K., & Geier, M. R. (2012). Hair toxic metal concentrations and autism spectrum disorder severity in young children. *International Journal of Environmental Research and Public Health*, 9(12), 4486–4497.
- Geier, D. A., Kern, J. K., King, P. G., Sykes, L. K., & Geier, M. R. (2015). A case-control study evaluating the relationship between thimerosal-containing haemophilus influenzae type b vaccine administration and the risk for a pervasive developmental disorder diagnosis in the United States. *Biological Trace Element Research*, 163(1–2), 28–38.
- Geier, D. A., Kern, J. K., King, P. G., Sykes, L. K., Homme, K. G., & Geier, M. R. (2014b). The risk of neurodevelopmental disorders following a thimerosal-preserved DTaP formulation in comparison to its thimerosal-reduced formulation in the vaccine adverse event reporting system (VAERS). *Journal of Biochemical Pharmacology Research*, 2(2), 64–73.
- Geier, D. A., Mumper, E., Gladfelter, B., Coleman, L., & Geier, M. R. (2008). Neurodevelopmental disorders, maternal Rh-negativity, and Rho(D) immune globulins: A multi-center assessment. *Neuroendocrinology Letters*, 29(2), 272–280.
- Grist staff. (2004). *Rhode Island lawsuit pinpoints lead poisoning as an environmental, not medical, problem*. <http://grist.org/article/spin2/>, www.grist.com. Accessed 06/11/2015.
- Halsey, N. A. (1999). *Perspective on the use of thimerosal-containing vaccines*. Presentation at the National Vaccine Advisory Committee Workshop on Thimerosal and Vaccines. Institute of Vaccine Safety website. [www.vaccinesafety.edu](http://www.vaccinesafety.edu), <http://www.vaccinesafety.edu/Testimony-099.htm>. Accessed 04/25/2015.
- Hanson, M., & Pleva, J. (1991). The dental amalgam issue—Review. *Experientia*, 47(1), 9–22.
- Hayes, T. (2004). There is no denying this: Defusing the confusion about atrazine. *BioScience*, 54(12), 1138–1149.
- Hertz-Picciotto, I., Green, P. G., Delwiche, L., Hansen, R., Walker, C., & Pessah, I. N. (2010). Blood mercury concentrations in CHARGE study children with and without autism. *Environmental Health Perspectives*, 118(1), 161–166.
- Hodgson, N. W., Waly, M. I., Al-Farsi, Y. M., Al-Sharbaty, M. M., Al-Farsi, O., Ali, A., et al. (2014). Decreased glutathione and elevated hair mercury levels are associated with nutritional deficiency-based autism in Oman. *Experimental Biology and Medicine (Maywood)*, 239(6), 697–706.
- Holmes, A. S., Blaxill, M. F., & Haley, B. E. (2003). Reduced levels of mercury in first baby haircuts of autistic children. *International Journal of Toxicology*, 22(4), 277–285.
- Hviid, A., Stellfeld, M., Wohlfarth, J., & Melbye, M. (2003). Association between thimerosal-containing vaccine and autism. *Journal of the American Medical Association*, 290, 1763–1766.
- Institute of Medicine. (2004). *Surgery PR, "NIAID studies on thimerosal"*. <http://iom.nationalacademies.org/~media/52DC480EA040B68D278387BC73B968.ashx>. Accessed 08/21/2015.
- Institute of Medicine Report. (2005). *Vaccine safety research, data access, and public trust*. <http://www.iom.edu/Reports/2005/Vaccine-Safety-Research-Data-Access-and-Public-Trust.aspx>. Accessed 05/21/2015.
- Ip, P., Wong, W., Ho, M., Lee, J., & Wong, W. (2004). Mercury exposure in children with autistic spectrum disorder: Case-control study. *Journal of Child Neurology*, 19(6), 431–434. (Erratum in: *J Child Neurol*. 2007;22(11):1324).
- James, G. J., Rose, S., Melnyk, S., Jernigan, S., Blossom, S., Pavliv, O., & Gaylor, D. W. (2009). Cellular and mitochondrial glutathione redox imbalance in lymphoblastoid cells derived from children with autism. *The FASEB Journal*, 23(8), 2374–2383.
- Keim, B. (2007). EPA silent on air pollution experts' conflicts of interest. <http://www.wired.com/2007/07/epa-silent-on-a/>. Accessed 05/13/2015.
- Kessler, D. A. (2001). *A question of intent: A great American battle with a deadly industry*. New York: Public Affairs.
- Khan, A., Harney, J. W., Zavacki, A. M., & Sajdel-Sulkowska, E. M. (2014). Disrupted brain thyroid hormone homeostasis and altered thyroid hormone-dependent brain gene expression in autism spectrum disorders. *Journal of Physiology and Pharmacology*, 65(2), 257–272.

- Lakshmi Priya, M. D., & Geetha, A. (2011). Level of trace elements (copper, zinc, magnesium and selenium) and toxic elements (lead and mercury) in the hair and nail of children with autism. *Biological Trace Element Research*, *142*(2), 148–158.
- Lenzer, J. (2015). Centers for disease control and prevention: Protecting the private good? *British Medical Journal*, *350*, h2362.
- Levine, J., Gussow, J. D., Hastings, D., & Eccher, A. (2003). Authors' financial relationships with the food and beverage industry and their published positions on the fat substitute olestra. *American Journal of Public Health*, *93*(4), 664–669.
- Lewandowski, T. A., Bartell, S. M., Yager, J. W., & Levin, L. (2009). An evaluation of surrogate chemical exposure measures and autism prevalence in Texas. *Journal of Toxicology and Environmental Health, Part A*, *72*(24), 1592–1603.
- Macedoni-Lukšič, M., Gosar, D., Bjørklund, G., Oražem, J., Kodrič, J., Lešnik-Musek, P., et al. (2015). Levels of metals in the blood and specific porphyrins in the urine in children with autism spectrum disorders. *Biological Trace Element Research*, *163*(1–2), 2–10.
- Madsen, K. M., Lauritsen, M. B., Pedersen, C. B., Thorsen, P., Plesner, A. M., Andersen, P. H., & Mortensen, P. B. (2003). Thimerosal and the occurrence of autism: Negative ecological evidence from Danish population-based data. *Pediatrics*, *112*(3 Pt 1), 604–606.
- Majewska, M. D., Urbanowicz, E., Rok-Bujko, P., Namysłowska, I., & Mierzejewski, J. (2010). Age-dependent lower or higher levels of hair mercury in autistic children than in healthy controls. *Acta Neurobiologiae Experimentalis (Wars)*, *70*(2), 196–208.
- Mars, S. G., & Ling, P. M. (2008). Meanings and motives: Experts debating tobacco addiction. *American Journal of Public Health*, *98*(10), 1793–1802.
- McComas, K. A. (2008). Session 5: Nutrition communication. The role of trust in health communication and the effect of conflicts of interest among scientists. *Proceedings of the Nutrition Society*, *67*(4), 428–436.
- McGarity, T., & Wagner, W. (2008). *Bending science: How special interests corrupt public health research*. Cambridge, MA: Harvard University Press.
- Michaels, D. (2008). *Doubt is their product: How industry's assault on science threatens your health*. New York: Oxford University Press.
- Miles, J. H., & Takahashi, T. N. (2007). Lack of association between Rh status, Rh immune globulin in pregnancy and autism. *Journal of Medical Genetics Part A*, *143A*(13), 1397–1407.
- Mooney, C. (2006). *Republican war on science*. New York: Basic Books.
- Mostafa, G. A., & AL-Ayadhi, L. A. (2005). The possible association between elevated levels of blood mercury and the increased frequency of serum anti-myelin basic protein auto-antibodies in autistic children. *Journal of Clinical & Cellular Immunology*, *6*, 2.
- Mostafa, G. A., & Refai, T. M. (2007). Antineuronal antibodies in autistic children: Relation to blood mercury. *Egyptian Journal of Pediatric Allergy and Immunology*, *5*(1), 21–30.
- Mrozek-Budzyn, D., Majewska, R., Kieltyka, A., & Augustyniak, M. (2011). Lack of association between thimerosal-containing vaccines and autism. *Przegląd Epidemiologiczny*, *65*(3), 491–495.
- Obrenovich, M. L., Chamberger, R. J., & Lonsdale, D. (2011). Altered heavy metals and transketolase found in autistic spectrum disorder. *Biological Trace Element Research*, *144*(1–3), 475–486.
- Ong, E. K., & Glantz, S. A. (2001). Constructing “sound science” and “good epidemiology”: Tobacco, lawyers, and public relations firms. *American Journal of Public Health*, *91*(11), 1749–1757.
- Palmieri, R. F., Blanchard, S., Stein, Z., Mandell, D., & Miller, C. (2006). Environmental mercury release, special education rates, and autism disorder: An ecological study of Texas. *Health Place*, *12*(2), 203–209.
- Palmieri, R. F., Blanchard, S., & Wood, R. (2009). Proximity to point sources of environmental mercury release as a predictor of autism prevalence. *Health Place*, *15*(1), 18–24.
- Price, C. S., Thompson, W. W., Goodson, B., Weintraub, E. S., Croen, L. A., Hinrichsen, V. L., et al. (2010). Prenatal and infant exposure to thimerosal from vaccines and immunoglobulins and risk of autism. *Pediatrics*, *126*, 656–664.
- Put Children First. (2006) *Chapter II: 1999–2000*. Simpsonwood. <http://putchildrenfirst.org/chapter2.html>. Accessed 05/30/2015.
- Rahbar, M. H., Samms-Vaughan, M., Loveland, K. A., Ardjomand-Hessabi, M., Chen, Z., Bressler, J., et al. (2013). Seafood consumption and blood mercury concentrations in Jamaican children with and without autism spectrum disorders. *Neurotoxicity Research*, *23*(1), 22–38.

- Roberts, A. L., Lyall, K., Hart, J. E., Laden, F., Just, A. C., Bobb, J. F., et al. (2013). Perinatal air pollutant exposures and autism spectrum disorder in the children of Nurses' Health Study II participants. *Environmental Health Perspectives*, *121*(8), 978–984.
- Rose, S., Wynne, R., Frye, R. E., Melnyk, S., & James, S. J. (2015). Increased susceptibility to ethylmercury-induced mitochondrial dysfunction in a subset of autism lymphoblastoid cell lines. *Journal of Toxicology*, *2015*, 573701.
- Sass, J. (2006). Credibility of scientists: Conflict of interest and bias. *Environmental Health Perspectives*, *114*(3), A147–A148.
- Schechter, R., & Grether, J. K. (2008). Continuing increases in autism reported to California's developmental services system: Mercury in retrograde. *Archives of General Psychiatry*, *65*(1), 19–24.
- Schick, S. F., & Glantz, S. A. (2007). Old ways, new means: Tobacco industry funding of academic and private sector scientists since the master settlement agreement. *Tobacco Control*, *16*, 157–164.
- Shandley, K., & Austin, D. W. (2011). Ancestry of pink disease (infantile acro-dynia) identified as a risk factor for autism spectrum disorders. *Journal of Toxicology and Environmental Health, Part A*, *74*(18), 1185–1194.
- Sharpe, M. A., Gist, T. L., & Baskin, D. S. (2013). B-lymphocytes from a population of children with autism spectrum disorder and their unaffected siblings exhibit hypersensitivity to thimerosal. *Journal of Toxicology*, *2013*, 801517.
- Singh, V. K., & Hanson, J. (2006). Assessment of metallothionein and antibodies to metallothionein in normal and autistic children having exposure to vaccine-derived thimerosal. *Pediatric Allergy and Immunology*, *17*(4), 291–296.
- Singh, V. K., & Rivas, W. H. (2004). Detection of antinuclear and anti-annin antibodies in autistic children who received thimerosal-containing vaccines. *Journal of Biomedical Science*, *11*(5), 607–610.
- Smith, B. D., Morgan, R. L., Beckett, G. A., Falck-Ytter, Y., Holzman, D., Teo, C. G., et al. (2012). Recommendations for the identification of chronic hepatitis C virus infection among persons born during 1945–1965. *MMWR Recommendations and Reports*, *61*(RR-4), 1–32.
- Soden, S. E., Lowry, J. A., Garrison, C. B., & Voserman, G. S. (2007). 24-Hour provoked urine excretion test for heavy metals in children with autism and typically developing controls, a pilot study. *Clinical Toxicology*, *45*(5), 476–481.
- Stamova, B., Green, P. G., Tian, Y., Hertz-Viscicchio, I., Pessah, I. N., Hansen, R., et al. (2011). Correlations between gene expression and mercury levels in blood of boys with and without autism. *Neurotoxicity Research*, *19*(1), 31–44.
- Stehr-Green, P., Tull, P., Stellfeld, M., Mortenson, P. B., & Simpson, D. (2003). Autism and thimerosal-containing vaccines: Lack of consistent evidence for an association. *American Journal of Preventive Medicine*, *25*, 101–106.
- Sykes, L. K., Geier, D., King, P. G., Kern, J. K., Haley, B. E., Chaigneau, C. G., et al. (2014). Thimerosal as discrimination: Vaccine disparity in the UN Minamata convention on mercury. *Indian Journal of Medical Ethics*, *11*(4), 206–218.
- Takeuchi, T., Imai, K., Yanag, S., & Miyajima, H. (1978). Ultrastructural changes of human sural nerves in the neuropathy induced by intrauterine methylmercury poisoning (so-called fetal Minamata disease). *Virchows Archiv B Cell Pathology*, *27*(2), 137–154.
- Tong, E. K., & Glantz, S. A. (2007). Tobacco industry efforts undermining evidence linking secondhand smoke with cardiovascular disease. *Circulation*, *116*(16), 1845–1854.
- Ueda, Y., Uchiyama, T., Kurosawa, M., Aleksic, B., & Ozaki, N. (2015). Early exposure to the combined measles–mumps–rubella vaccine and thimerosal-containing vaccines and risk of autism spectrum disorder. *Vaccine*, *33*(21), 2511–2516.
- van Naarden Braun, K., Christensen, D., Doernberg, N., Schieve, L., Rice, C., Wiggins, L., et al. (2015). Trends in the prevalence of autism spectrum disorder, cerebral palsy, hearing loss, intellectual disability, and vision impairment, metropolitan Atlanta, 1991–2010. *PLoS ONE*, *10*(4), e0124120.
- van Wijngaarden, E., Davidson, P. W., Smith, T. H., Evans, K., Yost, K., Love, T., et al. (2013). Autism spectrum disorder phenotypes and prenatal exposure to methylmercury. *Epidemiology*, *24*(5), 651–659.
- Verstraeten, T., Davis, R. L., DeStefano, F., Lieu, T. A., Rhodes, P. H., Black, S. B., et al. (2003). Safety of thimerosal-containing vaccines: A two-phased study of computerized health maintenance organization databases. *Pediatrics*, *112*(5), 1039–1048.

- Verstraeten, T., Davis, R. L., Gu, D., & DeStefano, F. (2000). Increased risk of developmental neurologic impairment after high exposure to thimerosal-containing vaccine in first month of life. In *Epidemic intelligence service annual conference* (Vol. 49). Atlanta, GA: Centers for Disease Control and Prevention.
- Vojdani, A., Pangborn, J. B., Vojdani, E., & Cooper, E. L. (2003). Infections, toxic chemicals and dietary peptides binding to lymphocyte receptors and tissue enzymes are major instigators of autoimmunity in autism. *International Journal of Immunopathology and Pharmacology*, *16*(3), 189–199.
- vom Saal, F. S., & Hughes, C. (2005). An extensive new literature concerning low-dose effects of bisphenol A shows the need for a new risk assessment. *Environmental Health Perspectives*, *113*(8), 926–933.
- Walker, S. J., Segal, J., & Aschner, M. (2006). Cultured lymphocytes from autistic children and non-autistic siblings up-regulate heat shock protein RNA in response to thimerosal challenge. *Neurotoxicology*, *27*(5), 685–692.
- Warkany, J., & Hubbard, D. M. (1948). Mercury in the urine of children with acrodynia. *Lancet*, *1*(609), 829.
- Windham, G. C., Zhang, L., Gunier, R., Croen, L. A., & Grether, J. K. (2006). Autism spectrum disorders in relation to distribution of hazardous air pollutants in the San Francisco bay area. *Environmental Health Perspectives*, *114*(9), 1438–1444.
- Wright, B., Pearce, H., Allgar, V., Miles, J., Whitton, C., Leon, I., et al. (2012). A comparison of urinary mercury between children with autism spectrum disorders and control children. *PLoS ONE*, *7*(2), e29547.
- Yassa, H. A. (2014). Autism: A form of lead and mercury toxicity. *Environmental Toxicology and Pharmacology*, *38*(3), 1016–1024.
- Yasuda, H., & Tsutsui, T. (2013). Assessment of infantile mineral imbalances in autism spectrum disorders (ASDs). *International Journal of Environmental Research and Public Health*, *10*(11), 6027–6043.
- Yau, V. M., Green, P. G., Alaimo, C. P., Yoshida, C. K., Lutsky, M., Windham, G. C., et al. (2014). Prenatal and neonatal peripheral blood mercury level and autism spectrum disorders. *Environmental Research*, *133*, 294–303.
- Young, H. A., Geier, D. A., & Geier, M. R. (2008). Thimerosal exposure in infants and neurodevelopmental disorders: An assessment of computerized medical records in the vaccine safety datalink. *Journal of the Neurological Sciences*, *271*(1–2), 110–118.
- Zhang, L., & Wong, M. H. (2007). Environmental mercury contamination in China: Sources and impacts. *Environment International*, *33*(1), 106–121.
